# Supplementary material for: Can Si-embedded boron nitride nanotubes act as a favorable metal-free catalyst for CO oxidation by N2O?
Source: Royal Society of Chemistry journal article supplement (doi:10.1039/c5ra20180b), 2015-01-01
Supplement: c5ra20180b1.pdf [file c5ra20180b1.pdf]

# “Supporting Information”

## **Can Si-embedded boron nitride nanotubes act as a favorable metal-free catalyst for CO oxidation by N<sub>2</sub>O?**

**Mehdi D. Esrafil<sup>\*</sup>, Nasibeh Saeidi, Parisa Nematollahi**

Laboratory of Theoretical Chemistry, Department of Chemistry, University of Maragheh, Maragheh, Iran

\* Corresponding author. **Phone:** (+98) 4212237955. **Fax:** (+98) 4212276060. **P.O. Box:** 5513864596. **E-mail:** [esrafil@maragheh.ac.ir](mailto:esrafil@maragheh.ac.ir) (Mehdi D. Esrafil).

**Figure S1.** The optimized structures of the pristine long-length (6,0) BNNT along with the Si-doped configurations. All bond distances are in Å

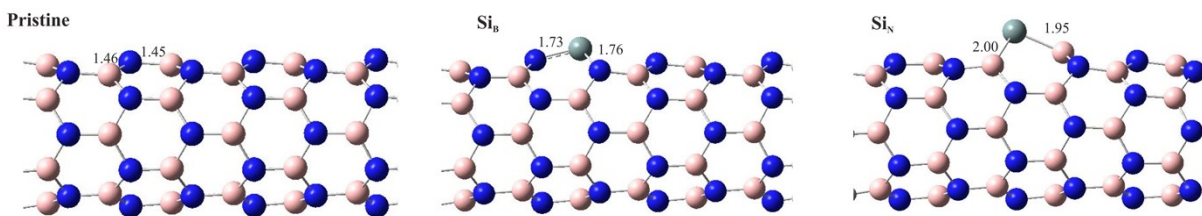

**Figure S2.** Optimized structures of adsorbed  $N_2O/CO$  molecules over a long-length (6,0) BNNT. All bond distances are in Å.

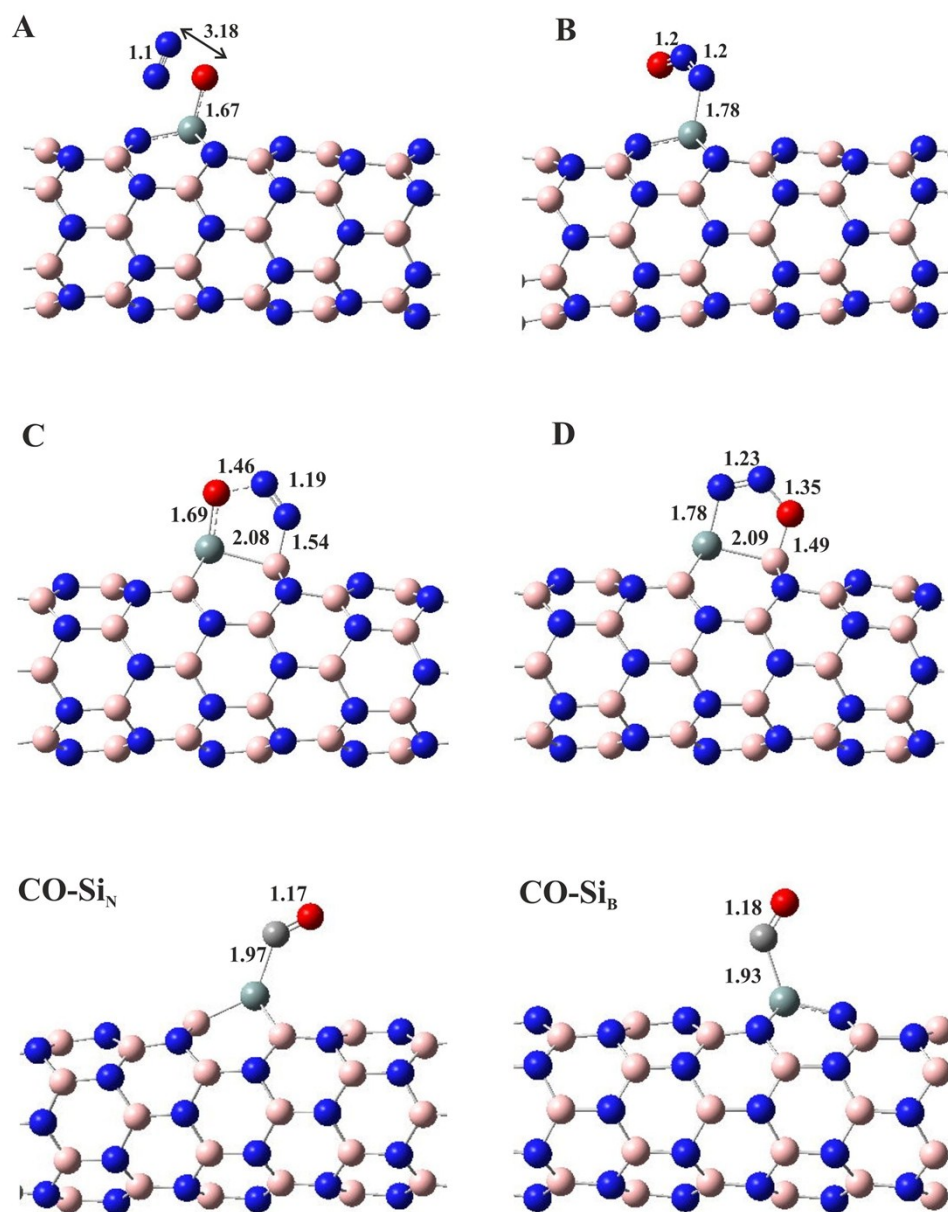

**Figure S3.** Local configurations of the gas molecules over the long-length (6,0) BNNT in various states, including the initial state (IS), transition state (TS) and final state (FS) along the minimum-energy pathway via the  $\text{N}_2\text{O} \rightarrow \text{O}^* + \text{N}_2$  and  $\text{O}^* + \text{CO} \rightarrow \text{CO}_2$  routes. All bond distances are in Å.

(Si<sub>B</sub>)

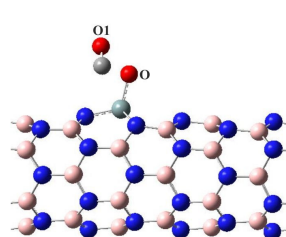

Si<sub>B</sub>-O\* + CO

r (Si-O)= 1.67  
r (O-C)= 2.69  
r (C-O1)= 1.13

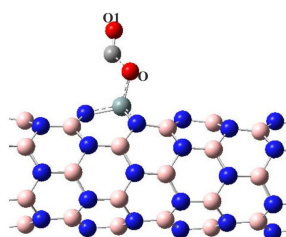

TS-1

r (Si-O)= 1.67  
r (O-C)= 2.04  
r (C-O1)= 1.13

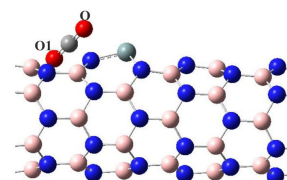

Si<sub>B</sub> + CO<sub>2</sub>

r (Si-O)= 4.61  
r (O-C)= 1.16  
r (C-O1)= 1.16

(Si<sub>N</sub>)

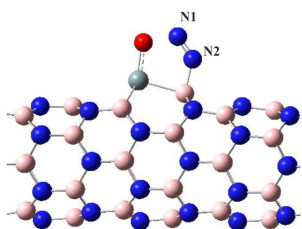

C

r (Si-O)= 1.69  
r (O-N1)= 1.47  
r (N1-N2)= 1.19  
r (N2-B)= 1.54

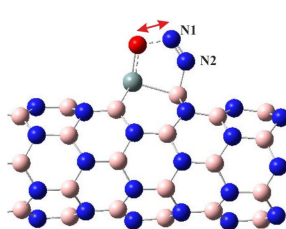

TS-2

r (Si-O)= 1.67  
r (O-N1)= 1.54  
r (N1-N2)= 1.19  
r (N2-B)= 1.54

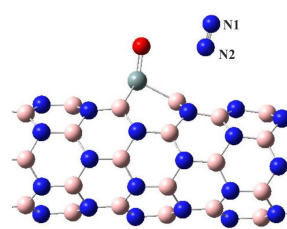

Si<sub>N</sub>-O\* + N<sub>2</sub>

r (Si-O)= 1.58  
r (O-N2)= 2.92  
r (N1-N2)= 1.10  
r (N2-B)= 2.80

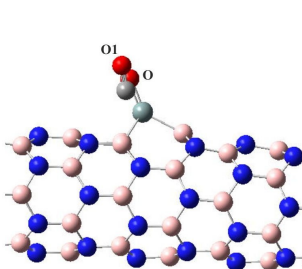

Si<sub>N</sub>-O\* + CO

r (Si-O)= 1.58  
r (O-C)= 2.93  
r (C-O1)= 1.13

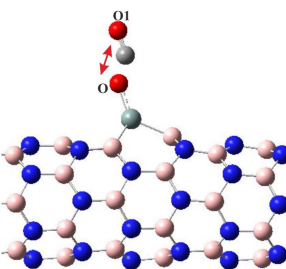

TS-3

r (Si-O)= 1.66  
r (O-C)= 1.92  
r (C-O1)= 1.14

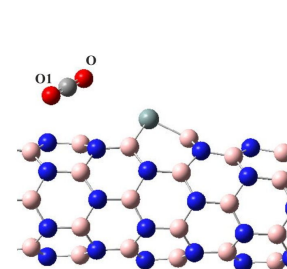

Si<sub>N</sub> + CO<sub>2</sub>

r (Si-O)= 3.42  
r (O-C)= 1.16  
r (C-O1)= 1.16

**Table S1.** Calculated binding distances (R) and adsorption energies ( $E_{\text{ads}}$ ) of the  $\text{N}_2\text{O}/\text{CO}$  adsorption over the long-length (6,0) BNNT

| configuration                           | R (Å) | $E_{\text{ads}}$ (kcal/mol) |
|-----------------------------------------|-------|-----------------------------|
| $\text{N}_2\text{O}-\text{Si}_\text{B}$ |       |                             |
| <b>A</b>                                | 1.67  | -79.21                      |
| <b>B</b>                                | 1.78  | -26.93                      |
| $\text{N}_2\text{O}-\text{Si}_\text{N}$ |       |                             |
| <b>C</b>                                | 1.69  | -28.89                      |
| <b>D</b>                                | 1.78  | -20.32                      |
| $\text{CO}-\text{Si}_\text{B}$          | 1.93  | -5.01                       |
| $\text{CO}-\text{Si}_\text{N}$          | 1.97  | -4.10                       |
